# Supplementary material
Source: Springer Nature journal article supplement (https://www.springermedizin.de/resource/supplementary/12889_2011_4414_MOESM1_ESM.pdf/9492544)
Supplement: MOESM1 [file 9492544]

|                                   |                 | Women               |        |         |        | Men                 |        |         |        |
|-----------------------------------|-----------------|---------------------|--------|---------|--------|---------------------|--------|---------|--------|
|                                   |                 | Alcohol consumption |        |         |        | Alcohol consumption |        |         |        |
|                                   |                 | ≥weekly             |        | <weekly |        | ≥weekly             |        | <weekly |        |
| Physical activity (MET.mins/week) |                 | PA≥600              | PA<600 | PA≥600  | PA<600 | PA≥600              | PA<600 | PA≥600  | PA<600 |
| Cigarette smoking                 | Body mass index |                     |        |         |        |                     |        |         |        |
| Never smoker                      | Normal          | 10                  | 15     | 13      | 18     | 19                  | 26     | 22      | 30     |
|                                   | Overweight      | 8                   | 12     | 10      | 15     | 17                  | 23     | 20      | 27     |
|                                   | Obese           | 10                  | 15     | 13      | 18     | 19                  | 25     | 22      | 29     |
| Ex-smoker                         | Normal          | 14                  | 20     | 17      | 24     | 27                  | 35     | 31      | 39     |
|                                   | Overweight      | 12                  | 17     | 15      | 21     | 24                  | 32     | 28      | 36     |
|                                   | Obese           | 14                  | 20     | 18      | 25     | 26                  | 34     | 30      | 39     |
| Current smoker                    | Normal          | 21                  | 29     | 25      | 34     | 39                  | 48     | 44      | 53     |
|                                   | Overweight      | 18                  | 25     | 21      | 29     | 36                  | 45     | 40      | 50     |
|                                   | Obese           | 29                  | 29     | 26      | 34     | 38                  | 48     | 43      | 53     |

|  |      |
|--|------|
|  | <20% |
|--|------|

|  |        |
|--|--------|
|  | 20-39% |
|--|--------|

|  |        |
|--|--------|
|  | 40-59% |
|--|--------|

|  |      |
|--|------|
|  | ≥60% |
|--|------|
